# Supplementary material
Source: publisher figshare collection journal article supplement (https://sage.figshare.com/ndownloader/files/17591462)
Supplement: Supplementary file 1 [file 17591462]

## Supplementary File 3 – Example of search strategy (MEDLINE)

| Ovid MEDLINE: Epub Ahead of Print, In-Process & Other Non-Indexed Citations, Ovid MEDLINE® Daily and Ovid MEDLINE® <1946-Present> |                                                                                                                                                                                                                                                                                                                                                                                  |         |
|-----------------------------------------------------------------------------------------------------------------------------------|----------------------------------------------------------------------------------------------------------------------------------------------------------------------------------------------------------------------------------------------------------------------------------------------------------------------------------------------------------------------------------|---------|
| #                                                                                                                                 | Searches                                                                                                                                                                                                                                                                                                                                                                         | Results |
| 1                                                                                                                                 | Hidradenitis Suppurativa/                                                                                                                                                                                                                                                                                                                                                        | 1154    |
| 2                                                                                                                                 | (hidradeniti* adj2 suppurativ*).mp. [mp=title, abstract, original title, name of substance word, subject heading word, keyword heading word, protocol supplementary concept word, rare disease supplementary concept word, unique identifier, synonyms]                                                                                                                          | 1788    |
| 3                                                                                                                                 | (hidradeniti* adj2 suppurativ*).tw,kf,kw.                                                                                                                                                                                                                                                                                                                                        | 1650    |
| 4                                                                                                                                 | (acne adj2 inversa*).tw,kf,kw.                                                                                                                                                                                                                                                                                                                                                   | 232     |
| 5                                                                                                                                 | apocrinitis.tw,kf,kw.                                                                                                                                                                                                                                                                                                                                                            | 4       |
| 6                                                                                                                                 | (apocrin* adj2 acne).tw,kf,kw.                                                                                                                                                                                                                                                                                                                                                   | 6       |
| 7                                                                                                                                 | (hidradeniti* adj2 axillar*).tw,kf,kw.                                                                                                                                                                                                                                                                                                                                           | 75      |
| 8                                                                                                                                 | Verneuil*.tw,kf,kw.                                                                                                                                                                                                                                                                                                                                                              | 78      |
| 9                                                                                                                                 | (Velpau* adj2 disease).tw,kf,kw.                                                                                                                                                                                                                                                                                                                                                 | 2       |
| 10                                                                                                                                | 1 or 2 or 3 or 4 or 5 or 6 or 7 or 8 or 9                                                                                                                                                                                                                                                                                                                                        | 1863    |
| 11                                                                                                                                | body mass index/                                                                                                                                                                                                                                                                                                                                                                 | 109980  |
| 12                                                                                                                                | body weight changes/ or weight loss/                                                                                                                                                                                                                                                                                                                                             | 31955   |
| 13                                                                                                                                | body weight/ or overweight/ or thinness/                                                                                                                                                                                                                                                                                                                                         | 205682  |
| 14                                                                                                                                | Ideal Body Weight/                                                                                                                                                                                                                                                                                                                                                               | 277     |
| 15                                                                                                                                | Body Weight Maintenance/                                                                                                                                                                                                                                                                                                                                                         | 115     |
| 16                                                                                                                                | body size/ or sagittal abdominal diameter/ or waist circumference/ or waist-height ratio/                                                                                                                                                                                                                                                                                        | 24053   |
| 17                                                                                                                                | body constitution/ or "body weights and measures"/ or body fat distribution/ or adiposity/ or somatotypes/                                                                                                                                                                                                                                                                       | 29865   |
| 18                                                                                                                                | anthropometry/ or kinanthropometry/                                                                                                                                                                                                                                                                                                                                              | 37122   |
| 19                                                                                                                                | Body Composition/                                                                                                                                                                                                                                                                                                                                                                | 38547   |
| 20                                                                                                                                | (weigh* or overweigh* or BMI or body mass index or quetelet* or thin* or lean* or underweigh* or somatotype* or ectomorph* or endomorph* or mesomorph*).tw,kf,kw.                                                                                                                                                                                                                | 1351653 |
| 21                                                                                                                                | (body adj2 (mass* or siz* or measure* or constitution* or composition* or type* or build*)).tw,kf,kw.                                                                                                                                                                                                                                                                            | 230770  |
| 22                                                                                                                                | (anthropometr* or kinanthropometr* or abdom* or waist*).tw,kf,kw.                                                                                                                                                                                                                                                                                                                | 382785  |
| 23                                                                                                                                | obesity/ or obesity, abdominal/ or obesity, metabolically benign/ or obesity, morbid/                                                                                                                                                                                                                                                                                            | 178394  |
| 24                                                                                                                                | abdominal fat/ or intra-abdominal fat/ or subcutaneous fat, abdominal/                                                                                                                                                                                                                                                                                                           | 6951    |
| 25                                                                                                                                | adipose tissue/ or adipose tissue, beige/ or adipose tissue, brown/ or adipose tissue, white/                                                                                                                                                                                                                                                                                    | 80874   |
| 26                                                                                                                                | Subcutaneous Fat/                                                                                                                                                                                                                                                                                                                                                                | 3653    |
| 27                                                                                                                                | Skinfold Thickness/                                                                                                                                                                                                                                                                                                                                                              | 6170    |
| 28                                                                                                                                | (skin* adj2 thickness).tw,kf,kw.                                                                                                                                                                                                                                                                                                                                                 | 12457   |
| 29                                                                                                                                | (obes* or fat* or adipos*).tw,kf,kw.                                                                                                                                                                                                                                                                                                                                             | 999070  |
| 30                                                                                                                                | 11 or 12 or 13 or 14 or 15 or 16 or 17 or 18 or 19 or 20 or 21 or 22 or 23 or 24 or 25 or 26 or 27 or 28 or 29                                                                                                                                                                                                                                                                   | 2581189 |
| 31                                                                                                                                | diet therapy/ or caloric restriction/ or diet, carbohydrate loading/ or diet, diabetic/ or diet, carbohydrate-restricted/ or diet, fat-restricted/ or diet, gluten-free/ or diet, mediterranean/ or diet, paleolithic/ or diet, protein-restricted/ or diet, reducing/ or diet, sodium-restricted/ or diet, vegetarian/ or diet, macrobiotic/ or diet, vegan/ or ketogenic diet/ | 50191   |
| 32                                                                                                                                | Feeding Behavior/                                                                                                                                                                                                                                                                                                                                                                | 74670   |
| 33                                                                                                                                | diet, atherogenic/ or diet fads/ or diet, high-fat/ or diet, western/ or energy intake/ or fasting/ or healthy diet/ or portion size/ or serving size/                                                                                                                                                                                                                           | 85882   |
| 34                                                                                                                                | Nutrition Therapy/                                                                                                                                                                                                                                                                                                                                                               | 1784    |
| 35                                                                                                                                | eating/ or drinking/ or nutritional requirements/ or recommended dietary allowances/ or nutritional status/ or nutritive value/ or glycemic index/ or glycemic load/                                                                                                                                                                                                             | 127115  |
| 36                                                                                                                                | exp Food/                                                                                                                                                                                                                                                                                                                                                                        | 1185954 |
| 37                                                                                                                                | dietary carbohydrates/ or dietary fats/ or dietary proteins/ or micronutrients/ or trace elements/ or vitamins/                                                                                                                                                                                                                                                                  | 136318  |
| 38                                                                                                                                | Nutritional Physiological Phenomena/                                                                                                                                                                                                                                                                                                                                             | 28861   |
| 39                                                                                                                                | Dietetics/                                                                                                                                                                                                                                                                                                                                                                       | 7454    |
| 40                                                                                                                                | (diet* or eat* or food* or feed* or drink* or intake* or fast* or nutri* or calor* or portion* or serving* or vegan* or vegetarian* or carbohydrate* or glycemic* or fat* or protein* or micronutrient* or mineral* or vitamin*).tw,kf,kw.                                                                                                                                       | 5332615 |
| 41                                                                                                                                | 31 or 32 or 33 or 34 or 35 or 36 or 37 or 38 or 39 or 40                                                                                                                                                                                                                                                                                                                         | 5958144 |
| 42                                                                                                                                | 30 or 41                                                                                                                                                                                                                                                                                                                                                                         | 7196378 |
| 43                                                                                                                                | 10 and 42                                                                                                                                                                                                                                                                                                                                                                        | 368     |
